# Supplementary material for: Ultrastable 3D cage-like metal–organic frameworks constructed using polydentate cyanurate ligands and their gas adsorption properties
Source: Royal Society of Chemistry journal article supplement (doi:10.1039/d3dt01317k), 2023-01-01
Supplement: d3dt01317k1.pdf [file d3dt01317k1.pdf]

## Supporting Information for

### **Ultrastable 3D cage-like metal-organic frameworks constructed by multidentate cyanurate ligand and gas adsorption properties**

Wenhao Xing, Kaijin Kang, Jian Tang, Chunlan, Tang, Wenlong Yin,\* Bin Kang, and  
Jianguo Deng

Institute of Chemical Materials, China Academy of Engineering Physics, Mianyang

621900 People's

E-mail: Wenlong Yin: [wlyin@caep.cn](mailto:wlyin@caep.cn).

## Density Functional Theory (DFT) Calculations

Structural optimization was performed by Vienna Ab-initio Simulation Package(VASP)[1] with the projector augmented wave (PAW) method[2]. The exchange-functional was treated using the Perdew-Burke-Ernzerhof (PBE)[3] functional in combination with the DFT-D3 correction[4], to describe the weak interactions between atoms. The cut-off energy of the plane-wave basis was set at 450 eV in structural optimization. For the optimization of both geometry and lattice size, the Brillouin zone integration was performed with a Monkhorst-Pack  $k$ -point mesh of  $0.04 \text{ \AA}^{-1}$ . Partial occupancies of the Kohn–Sham orbitals were allowed using the Gaussian smearing method and a width of 0.05 eV. A geometry optimization was considered convergent when the energy change was smaller than  $0.03 \text{ eV \AA}^{-1}$ .

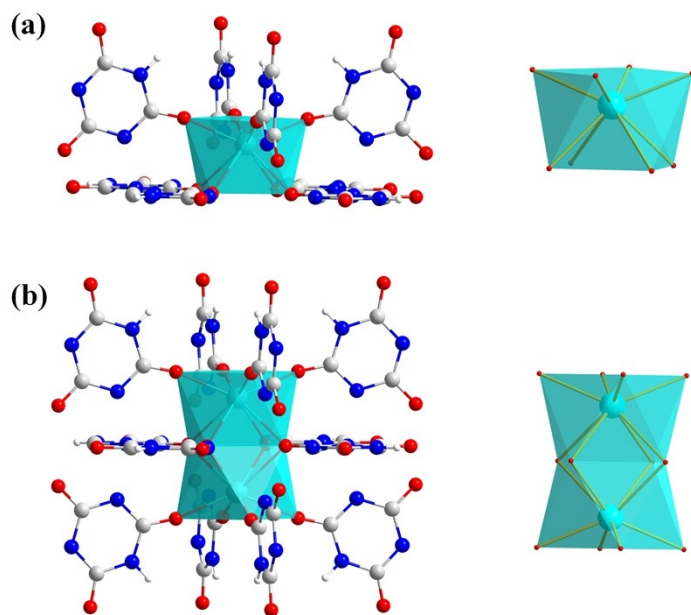

**Figure S1.** The coordination environment of Sr atom in SrCu(HC<sub>3</sub>N<sub>3</sub>O<sub>3</sub>)<sub>2</sub>.

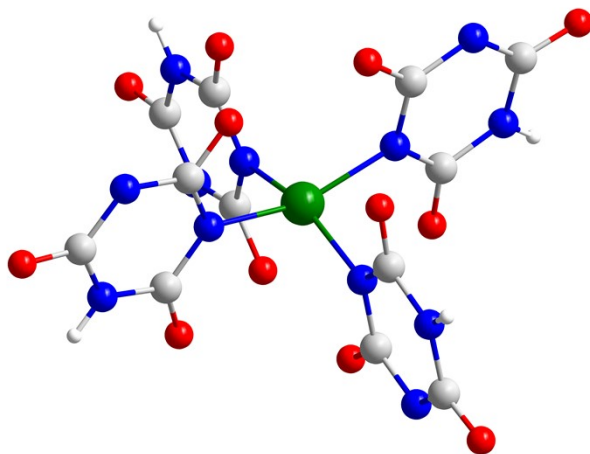

**Figure S2.** The coordination environment of Cu atom in SrCu(HC<sub>3</sub>N<sub>3</sub>O<sub>3</sub>)<sub>2</sub>.

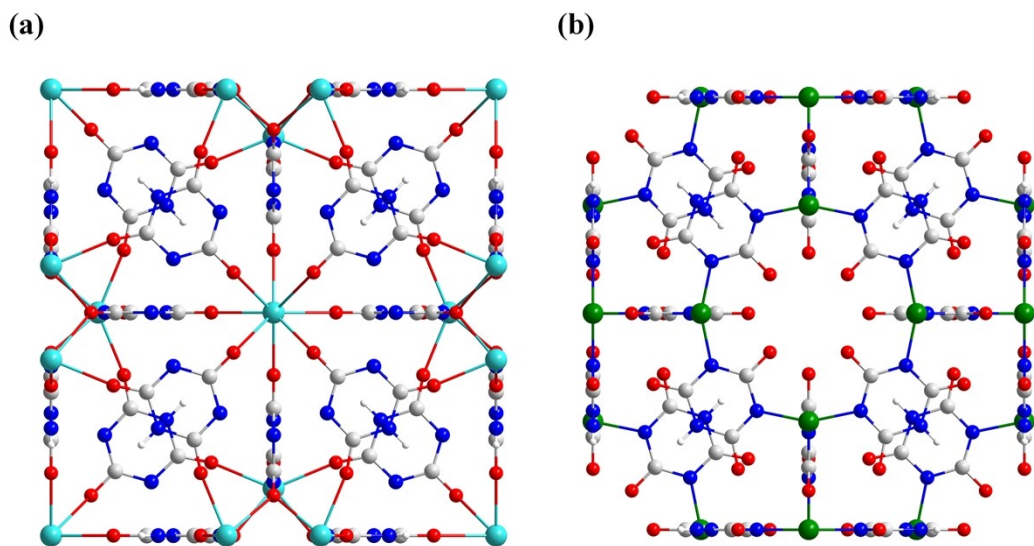

**Figure S3.** Two set of independent coordination frameworks constructed by (a) Sr and (b) Cu.

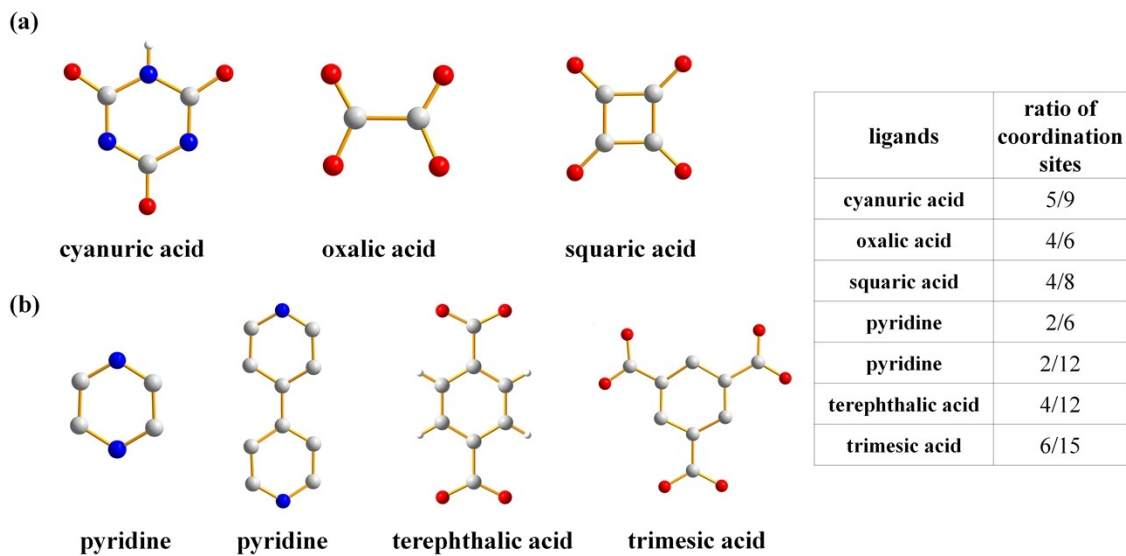

**Figure S4.** Some organic ligands and ratio of coordination sites.

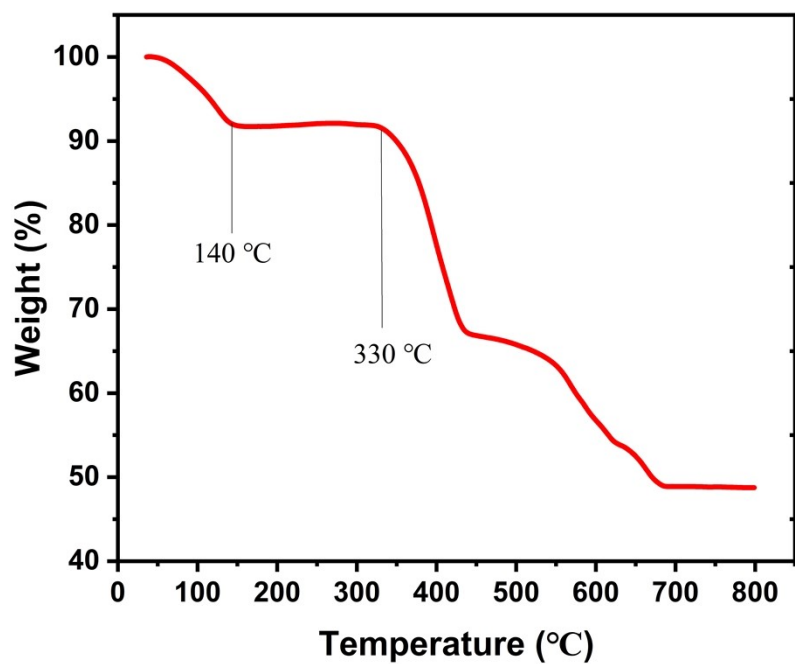

Figure S5. Thermogravimetric analysis curve of  $\text{SrCu}(\text{HC}_3\text{N}_3\text{O}_3)_2$ .

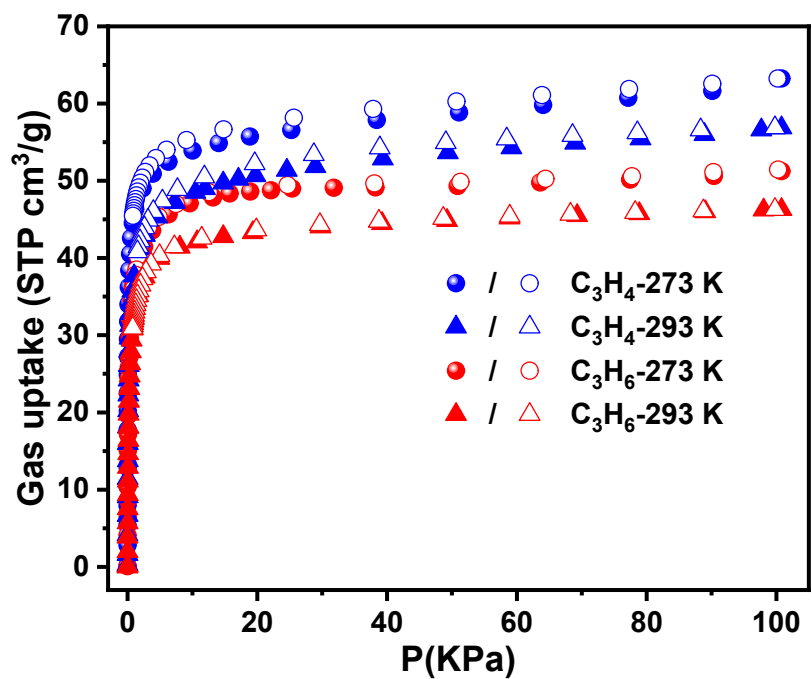

Figure S6.  $\text{C}_3\text{H}_4$  and  $\text{C}_3\text{H}_6$  adsorption/desorption isotherms 273 and 293 K for  $\text{SrCu}(\text{HC}_3\text{N}_3\text{O}_3)_2$ .

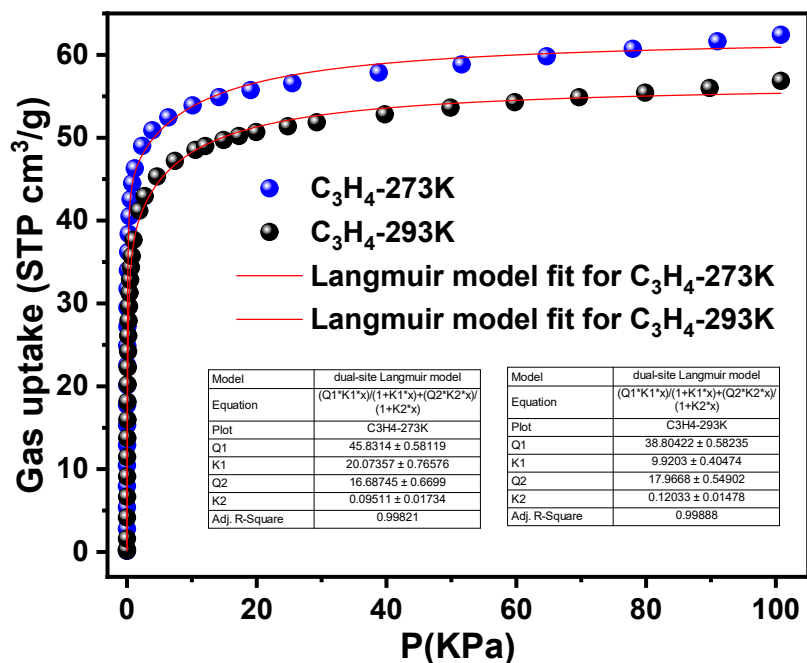

Figure S7. Nonlinear curve fitting of  $C_3H_4$  adsorption isotherms at 273 and 293 K for  $SrCu(HC_3N_3O_3)_2$  and using Double-site Langmuir model.

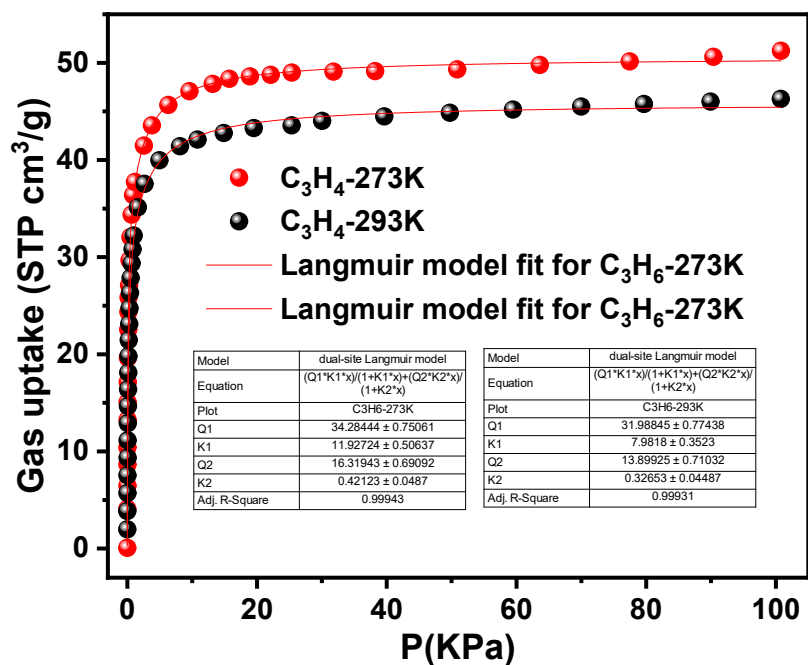

Figure S8. Nonlinear curve fitting of  $C_3H_6$  adsorption isotherms at 273 and 293 K for  $SrCu(HC_3N_3O_3)_2$  and using Double-site Langmuir model.

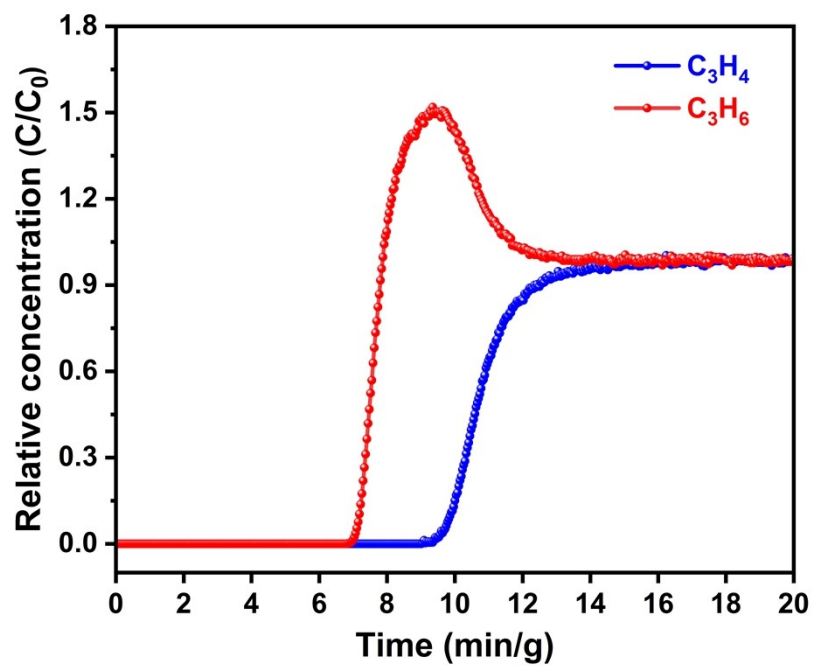

**Figure S9.** Column breakthrough curve for C<sub>3</sub>H<sub>4</sub>/C<sub>3</sub>H<sub>6</sub> (50:50) at 273 K.

**Table S1** Crystallographic data and structure refinement for SrCu(HC<sub>3</sub>N<sub>3</sub>O<sub>3</sub>)<sub>2</sub>.

| Formula                                                                           | SrCu(HC <sub>3</sub> N <sub>3</sub> O <sub>3</sub> ) <sub>2</sub>     |
|-----------------------------------------------------------------------------------|-----------------------------------------------------------------------|
| CCDC Number                                                                       | 2252835                                                               |
| Formula weight                                                                    | 405.3                                                                 |
| Temperature/K                                                                     | 296                                                                   |
| Crystal system                                                                    | cubic                                                                 |
| Space group                                                                       | <i>Im-3m</i>                                                          |
| <i>a</i> /Å                                                                       | 16.2073(10)                                                           |
| Volume/Å <sup>3</sup>                                                             | 4257.28(8)                                                            |
| Z                                                                                 | 12                                                                    |
| $\rho$ /(g/cm <sup>3</sup> )                                                      | 1.897                                                                 |
| $\mu$ /mm <sup>-1</sup>                                                           | 7.152                                                                 |
| F(000)                                                                            | 2340.0                                                                |
| Radiation                                                                         | Cu K $\alpha$ ( $\lambda$ = 1.54184)                                  |
| 2 $\theta$ range for data collection (°)                                          | 7.714 to 153.06                                                       |
| Index ranges                                                                      | -18 $\leq$ h $\leq$ 19, -15 $\leq$ k $\leq$ 19, -7 $\leq$ l $\leq$ 15 |
| Reflections collected                                                             | 2976                                                                  |
| Independent reflections                                                           | 450 [Rint = 0.0246, Rsigma = 0.0159]                                  |
| data/restraints/parameters                                                        | 450/0/37                                                              |
| GOOF on F <sup>2</sup>                                                            | 1.171                                                                 |
| <i>R</i> <sub>1</sub> , w <i>R</i> <sub>2</sub> (I > 2 $\sigma$ (I)) <sup>a</sup> | <i>R</i> <sub>1</sub> = 0.0212, w <i>R</i> <sub>2</sub> = 0.0581      |
| <i>R</i> <sub>1</sub> , w <i>R</i> <sub>2</sub> [all data]                        | <i>R</i> <sub>1</sub> = 0.0230, w <i>R</i> <sub>2</sub> = 0.0587      |
| Largest diff. peak/hole (e Å <sup>-3</sup> )                                      | 0.50/-0.39                                                            |

$$^a R_1 = \frac{\sum ||F_o| - |F_c||}{\sum |F_o|}, wR_2 = \left[ \frac{\sum w(F_o^2 - F_c^2)^2}{\sum w(F_o^2)^2} \right]^{1/2}$$

**Table S2** Atomic coordinates, equivalent isotropic displacement parameters for SrCu(HC<sub>3</sub>N<sub>3</sub>O<sub>3</sub>)<sub>2</sub>.

| Atom | <i>x</i> | <i>y</i>     | <i>z</i>     | <i>U</i> <sub>eq</sub> (Å <sup>2</sup> ) <sup>a</sup> |
|------|----------|--------------|--------------|-------------------------------------------------------|
| Sr1  | 0.5000   | 0.89341 (3)  | 0.5000       | 0.0200 (2)                                            |
| Cu1  | 0.5000   | 1.0000       | 0.2500       | 0.0165 (2)                                            |
| O1   | 0.5000   | 0.83693 (16) | 0.35841 (15) | 0.0525 (8)                                            |
| O2   | 0.5000   | 0.91127 (14) | 0.08873 (14) | 0.0316 (7)                                            |
| N2   | 0.5000   | 0.87922 (15) | 0.22478 (16) | 0.0229 (5)                                            |
| N1   | 0.5000   | 0.74117 (17) | 0.25883 (17) | 0.0475 (13)                                           |
| H1   | 0.5000   | 0.7036       | 0.2964       | 0.057*                                                |
| C1   | 0.5000   | 0.82169 (19) | 0.2837 (2)   | 0.0327 (7)                                            |

<sup>a</sup> *U*<sub>eq</sub> is defined as one-third of the trace of the orthogonalized *U*<sub>*ij*</sub> tensor.



**Table S3** Selected bond distances (Å) and band angles (°) for SrCu(HC<sub>3</sub>N<sub>3</sub>O<sub>3</sub>)<sub>2</sub>.

|                                         |             |                                          |             |
|-----------------------------------------|-------------|------------------------------------------|-------------|
| Sr1—O1                                  | 2.471 (2)   | Cu1—N2 <sup>ix</sup>                     | 2.000 (2)   |
| Sr1—O1 <sup>i</sup>                     | 2.471 (2)   | Cu1—N2 <sup>x</sup>                      | 2.000 (2)   |
| Sr1—O1 <sup>ii</sup>                    | 2.471 (2)   | C1—O1                                    | 1.235 (4)   |
| Sr1—O1 <sup>iii</sup>                   | 2.471 (2)   | C1—N1                                    | 1.366 (3)   |
| Sr1—O2 <sup>iv</sup>                    | 2.668 (2)   | C1—N2                                    | 1.335 (4)   |
| Sr1—O2 <sup>v</sup>                     | 2.668 (2)   | C2—O2                                    | 1.252 (5)   |
| Sr1—O2 <sup>vi</sup>                    | 2.668 (2)   | C2—N2                                    | 1.369 (3)   |
| Sr1—O2 <sup>vii</sup>                   | 2.668 (2)   | C2—N2 <sup>xiii</sup>                    | 1.369 (3)   |
| Cu1—N2                                  | 2.000 (2)   | N1—H1                                    | 0.8600      |
| Cu1—N2 <sup>viii</sup>                  | 2.000 (2)   |                                          |             |
| O1—Sr1—O1 <sup>i</sup>                  | 82.11 (4)   | N2—Cu1—N2 <sup>ix</sup>                  | 92.40 (3)   |
| O1—Sr1—O1 <sup>ii</sup>                 | 136.51 (13) | N2—Cu1—N2 <sup>viii</sup>                | 156.41 (15) |
| O1—Sr1—O1 <sup>iii</sup>                | 82.11 (4)   | N2—Cu1—N2 <sup>x</sup>                   | 92.40 (3)   |
| O1—Sr1—O2 <sup>iv</sup>                 | 137.77 (4)  | N2 <sup>x</sup> —Cu1—N2 <sup>viii</sup>  | 156.40 (15) |
| O1—Sr1—O2 <sup>v</sup>                  | 137.77 (4)  | N2 <sup>x</sup> —Cu1—N2 <sup>viii</sup>  | 92.40 (3)   |
| O1—Sr1—O2 <sup>vi</sup>                 | 74.89 (6)   | N2 <sup>viii</sup> —Cu1—N2 <sup>ix</sup> | 92.40 (3)   |
| O1—Sr1—O2 <sup>vii</sup>                | 74.89 (6)   | C1—N2—C2                                 | 120.2 (3)   |
| O2 <sup>iv</sup> —Sr1—O2 <sup>v</sup>   | 65.22 (5)   | C1—N1—C1 <sup>xiii</sup>                 | 124.4 (4)   |
| O2 <sup>iv</sup> —Sr1—O2 <sup>vi</sup>  | 99.31 (9)   | N1—C1—O1                                 | 118.7 (3)   |
| O2 <sup>iv</sup> —Sr1—O2 <sup>vii</sup> | 65.22 (5)   | N1—C1—N2                                 | 117.1 (3)   |
|                                         |             | N2—C1—O1                                 | 124.2 (3)   |

Symmetry codes: (i)  $z, y, -x+1$ ; (ii)  $x, y, -z+1$ ; (iii)  $-z+1, y, -x+1$ ; (iv)  $z+1/2, -x+3/2, -y+3/2$ ;  
(v)  $-z+1/2, -x+3/2, -y+3/2$ ; (vi)  $-z+1/2, x+1/2, y-1/2$ ; (vii)  $z+1/2, x+1/2, y-1/2$ ; (viii)  $-x+1, -y+2, z$ ;  
(ix)  $y-1/2, x+1/2, -z+1/2$ ; (x)  $-y+3/2, -x+3/2, -z+1/2$ ; (xi)  $y-1/2, z+1/2, x-1/2$ ;  
(xii)  $-y+3/2, -z+3/2, -x+1/2$ ; (xiii)  $x, -z+1, -y+1$ .

## References

1. J. Hafner, *J. Comput. Chem.*, 2008, 29, 2044-2078.
2. P. E. Blöchl, *Phys. Rev. B* 1994, 50, 17953.
3. J. P. Perdew, K. Burke, M. Ernzerhof, *Phys. Rev. Lett.* 1996, 77, 3865.
4. S. Grimme, *J. Comput. Chem.* 2006, 27, 1787.
